# Supplementary material
Source: PubMed Central journal article supplement (PMC7846242)
Supplement: mmc1.pdf [file mmc1.pdf]

**Immunity, Volume 54**

**Supplemental information**

**Leveraging the antiviral type I interferon  
system as a first line of defense  
against SARS-CoV-2 pathogenicity**

**Daisy A. Hoagland, Rasmus Møller, Skyler A. Uhl, Kohei Oishi, Justin Frere, Ilona Golynger, Shu Horiuchi, Maryline Panis, Daniel Blanco-Melo, David Sachs, Knarik Arkun, Jean K. Lim, and Benjamin R. tenOever**

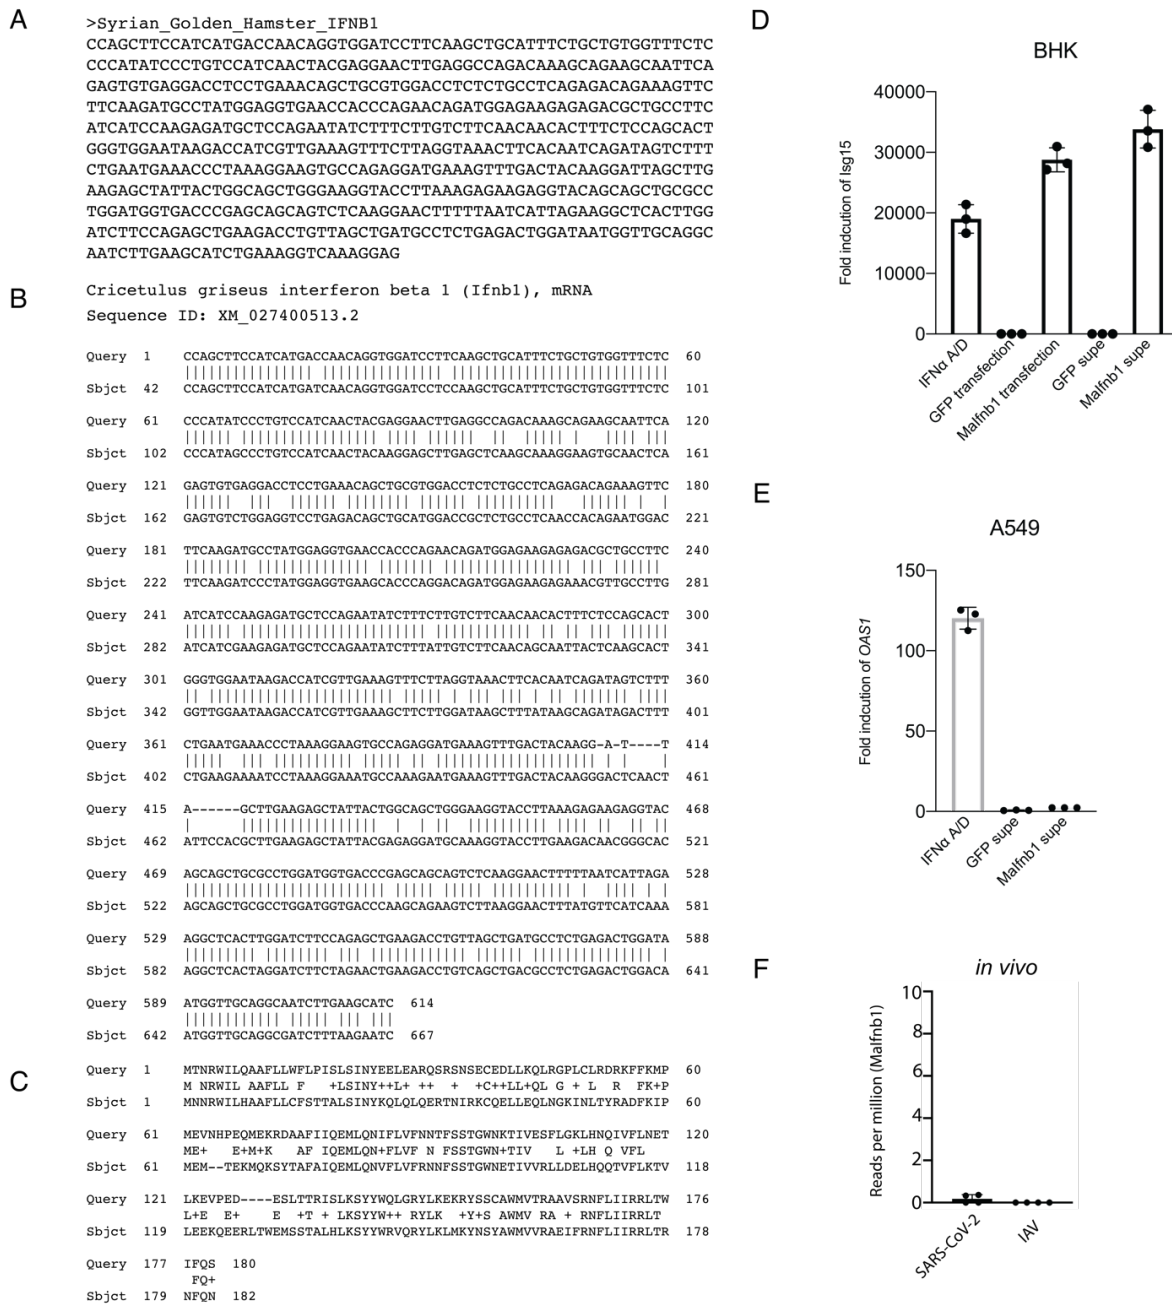

**Figure S1. De novo assembly of *Mesocricetus auratus Ifnb1*. Related to Figure 1.**

De novo assembly was performed using mRNA-seq reads from hamster trachea on day one after SARS-CoV-2 infection, (A) displaying the mRNA sequence deposited to NCBI. (B) Alignment to *Cricetulus griseus Ifnb1* mRNA. (C) Alignment of *Mesocricetus auratus* IFNB1 to *Peromyscus leucopus* IFNB1 at the protein level. (D) Relative expression of *Isg15* measured by qRT-PCR in BHK-21 cells treated with either IFN $\alpha$  A/D, transfected with constructs encoding green fluorescent protein (GFP) or *Mesocricetus auratus Ifnb1* (Malfnb1), or treated with supernatant (supe) from cells transfected with the constructs indicated for 16 hours. (E) Relative expression of *OAS1* measured by qRT-PCR in human A549 cells treated with either IFN $\alpha$  A/D or supernatant from BHK-21 cells transfected with the constructs indicated. (F) Reads per million of *Malfnb1* in mRNA-seq datasets of lungs from hamsters infected with either SARS-CoV-2 or IAV.

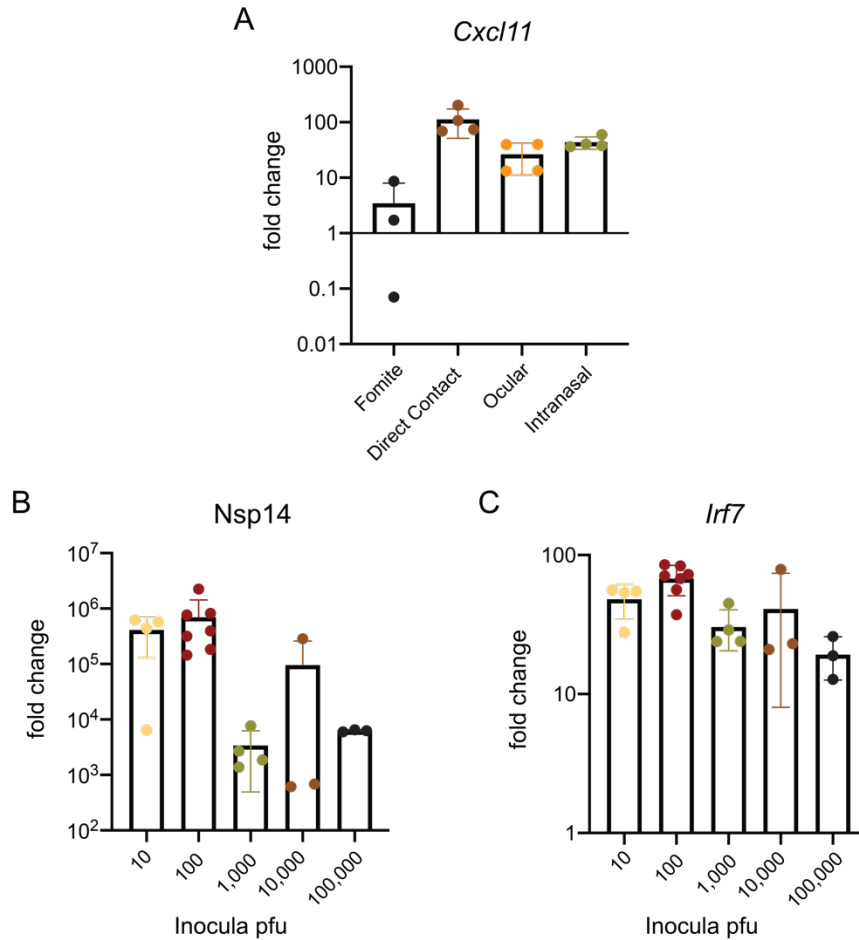

**Figure S2. Corroborating immune response and vRNA-levels of different infection parameters. Related to Figure 2.** (A) Relative *Cxcl11* expression at four days post infection from either fomite, direct contact with an infected animal, ocular or intranasal direct infection ( $n = 4$ ; fomite transmission,  $n = 3$ ). (B) SARS-CoV-2 *Nsp14* vRNA-levels and (C) *Irf7* expression measured by qRT-PCR and graphed as fold change following infection with 10, 100, 1,000, 10,000, or 100,000 pfu of SARS-CoV-2, shown as fold change of transcript abundance compared to uninfected controls. ( $n = 4$  for 10 pfu and 1,000 pfu,  $n = 6$  for 100 pfu, and  $n = 3$  for 10,000 pfu and 100,000 pfu).

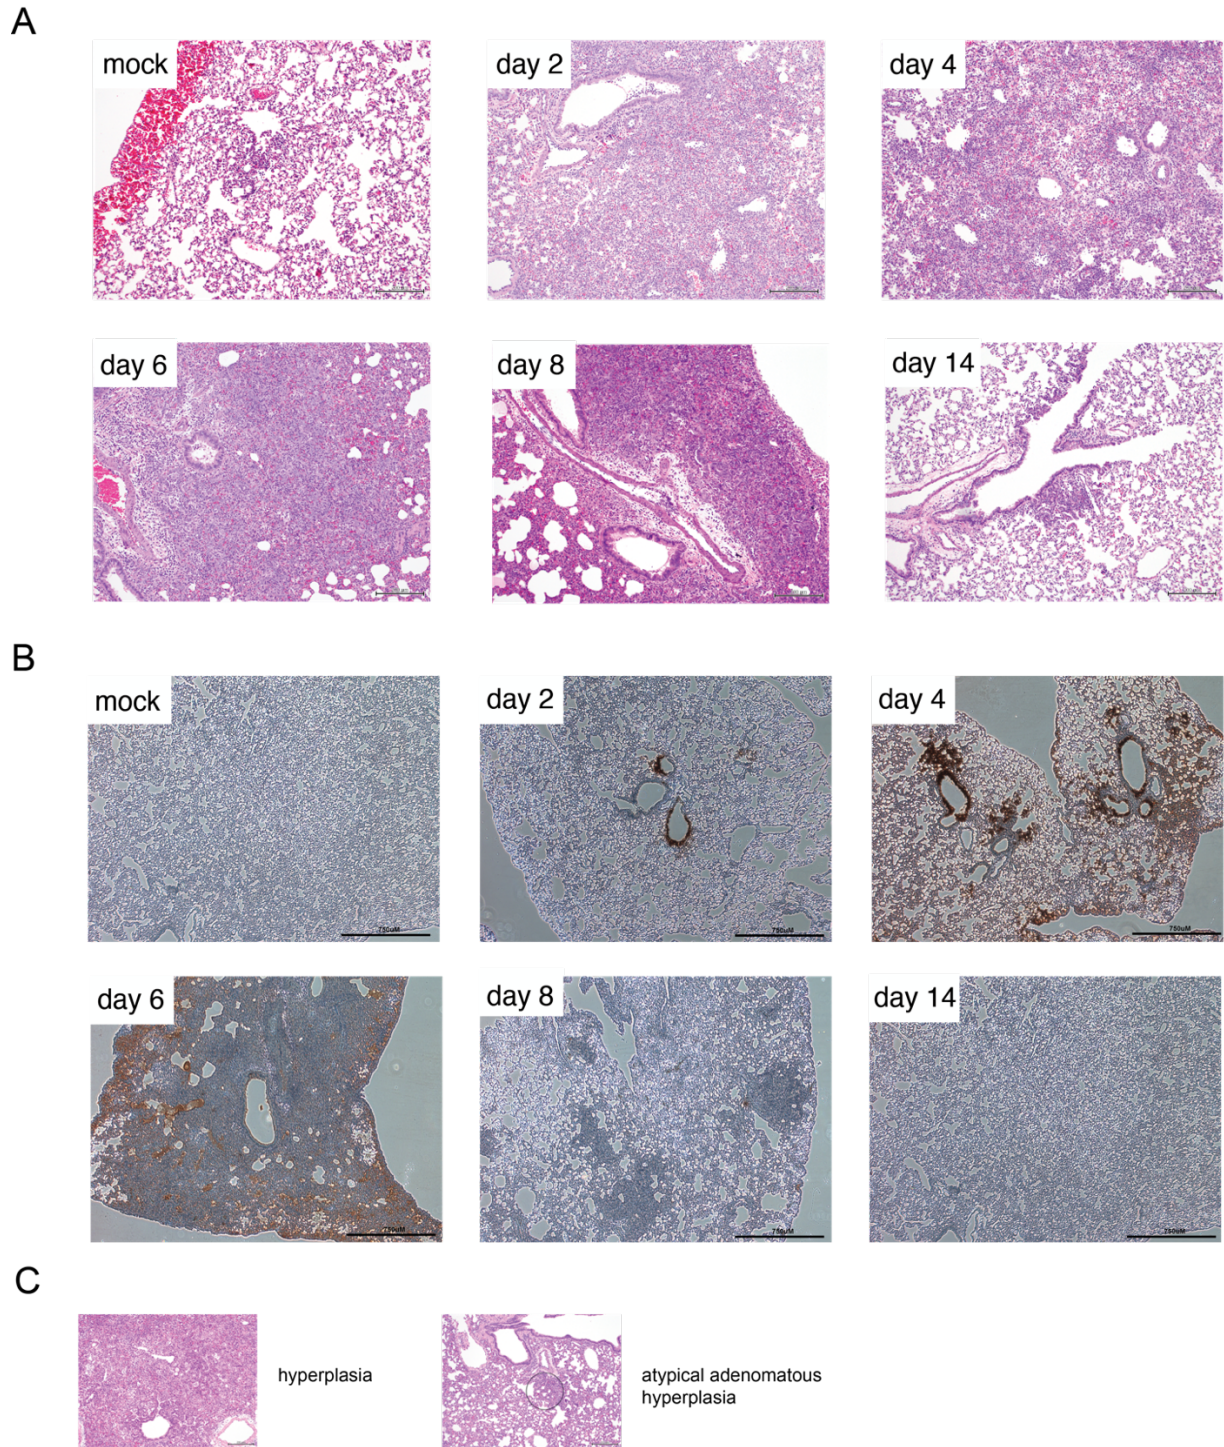

**Figure S3. Representative images of lung pathology time course. Related to Figure 3.**

Representative images of lungs assessed for pathology at a lower magnification from hamsters infected intranasally with 100 pfu of SARS-CoV-2 and harvested at day two, four, six, eight, or 14 post infection of (A) H&E staining (scale bar = 200  $\mu$ m) and (B) immunohistochemistry with nucleocapsid-specific antibody (scale bar = 750  $\mu$ m). (C) Representative images of hyperplasia and atypical adenomatous hyperplasia in hamster lungs (scale bar = 200  $\mu$ m).



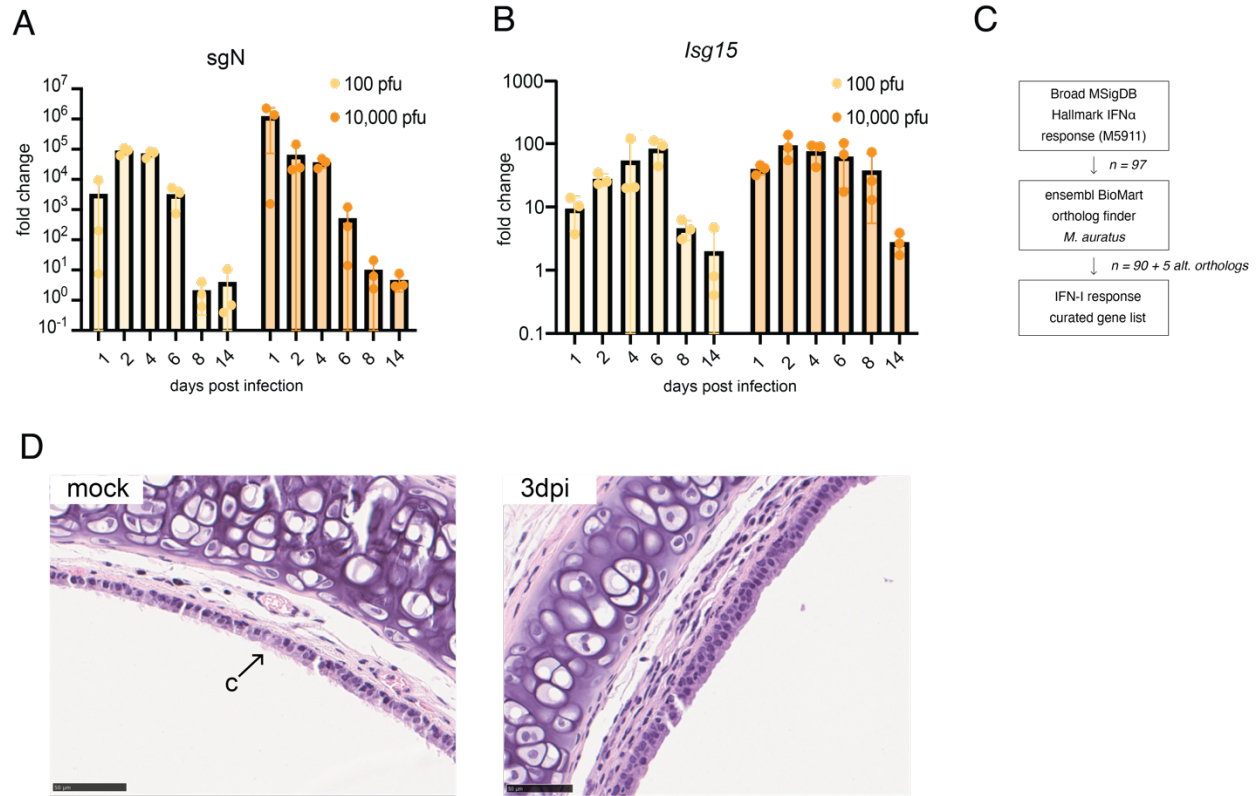

**Figure S4. Defining temporal viral sgRNA levels and ISG signature in Golden Syrian hamsters across time at two different challenge doses. Related to Figure 4.** (A) Nucleocapsid sgRNA and (B) *Isg15* qRT-PCR of RNA from total perfused lung harvested at indicated days post infection with 100 pfu or 10,000 pfu of SARS-CoV-2. RNA levels were normalized to those of RNA from mock-infected hamsters and represented as fold change, ( $n = 3$  for all time points and treatment groups). (C) Curated list of IFN-I response genes used to generate the heat maps in Figure 4A-B. (D) Representative H&E images of trachea from a mock-infected hamster and hamsters infected with 100 pfu SARS-CoV-2 and collected three days post infection. "C" indicates cilia on the cells of the tracheal epithelium (scale bar = 50  $\mu$ m).

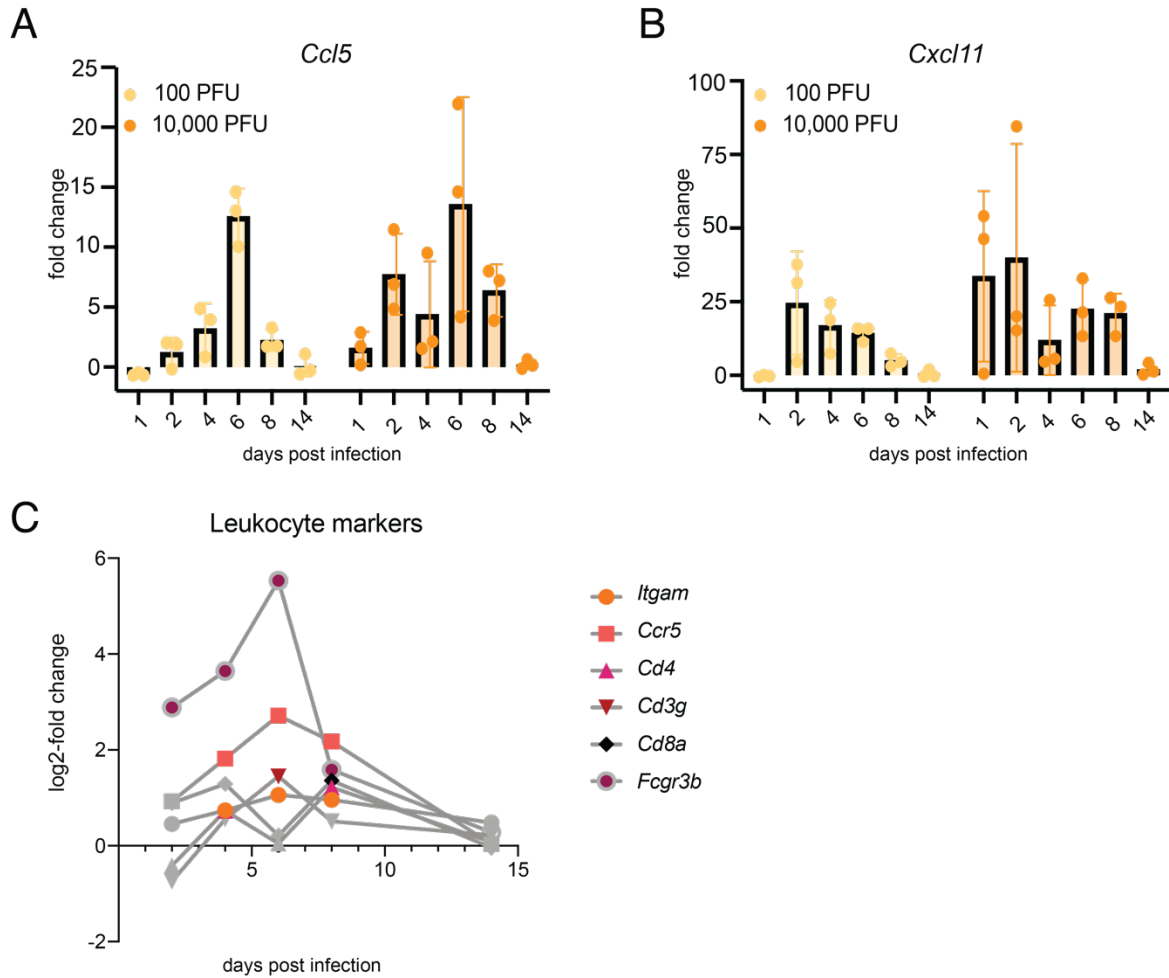

**Figure S5. Defining the temporal cytokine response in Golden Syrian hamsters across time at two different challenge doses. Related to Figure 5.** (A) *Cxcl11* and (B) *Ccl5* qRT-PCR of RNA from total perfused lung harvested at indicated days post infection with 100pfu or 10,000pfu of SARS-CoV-2. RNA levels were normalized to those of RNA from mock-infected hamsters and represented as fold change, ( $n = 3$  per condition for all time points and treatment groups). (C) log<sub>2</sub> fold change of indicated cell surface markers from RNA-seq dataset of hamsters infected with 100 pfu SARS-CoV-2 ( $n = 3$  per condition). Timepoints of markers with differential expression with  $p < 0.05$  have colored symbols; data points in grey do not reach significance.

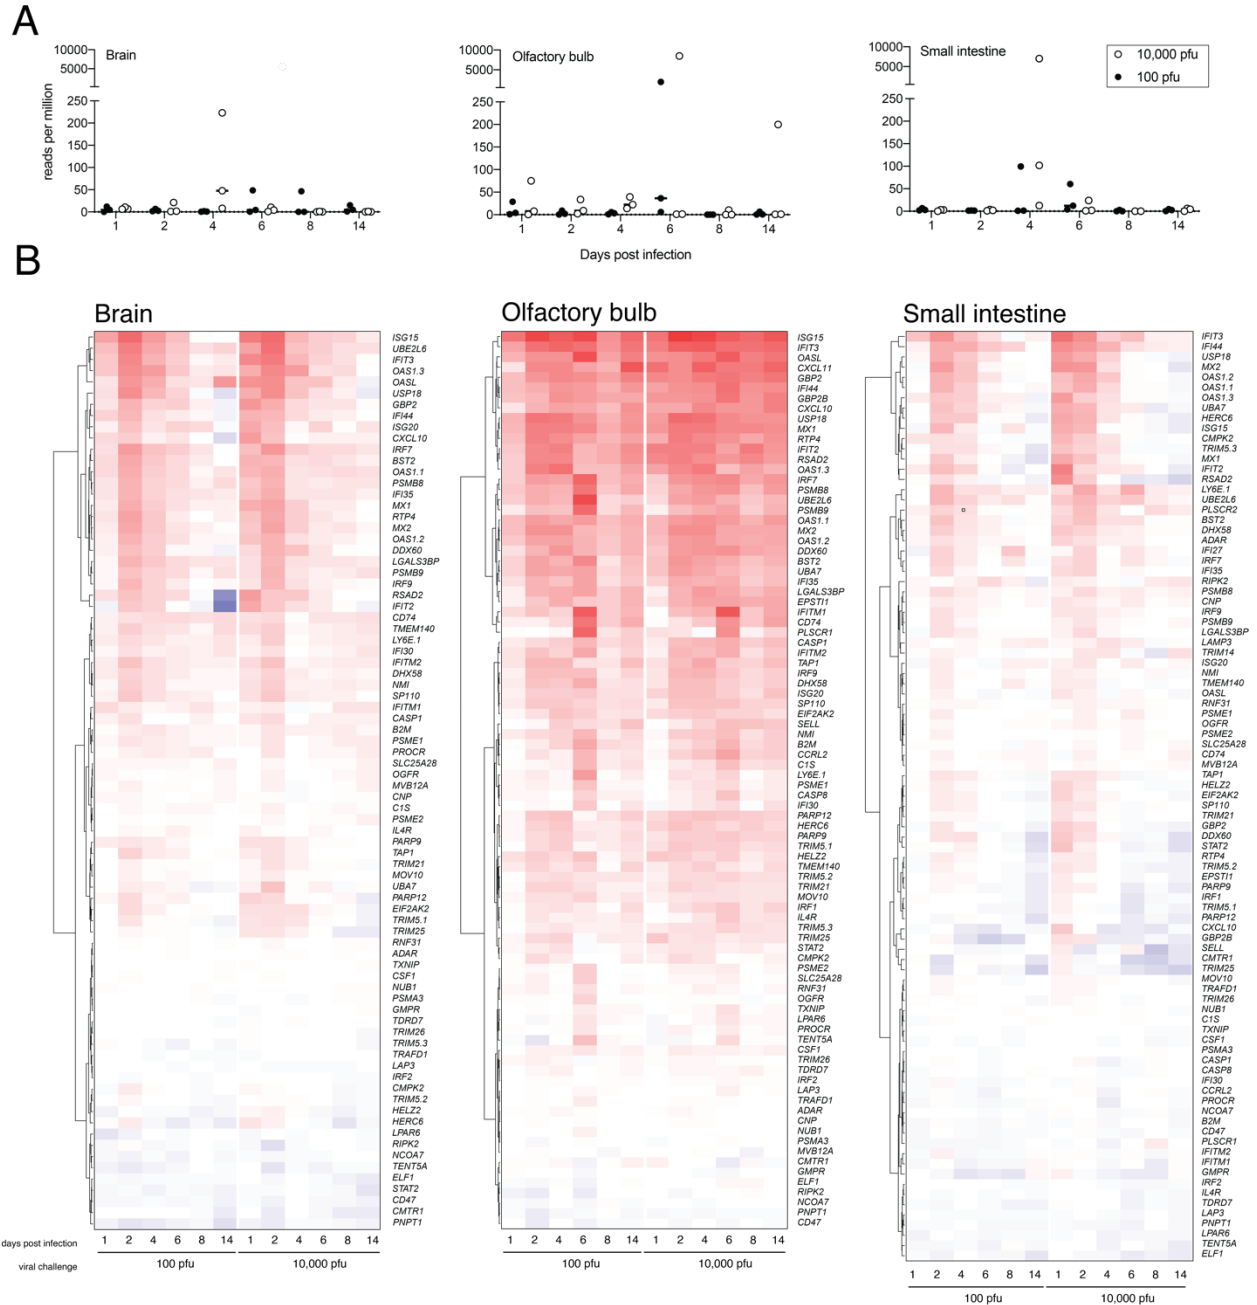

**Figure S6. IFN-I signature of distal tissues. Related to Figure 6.**

(A) Reads per million mapping to the SARS-CoV-2 genome in brain, olfactory bulb, and small intestine at the time points and inocula indicated ( $n = 3$ , except for small intestine, day 8, 10,000 pfu  $n = 2$ ). (B) Differential gene expression of a curated list of interferon-stimulated genes calculated from bulk RNA sequencing of mRNA from brain, olfactory bulb and small intestine of hamsters infected with SARS-CoV-2 for the times and dosage indicated compared to uninfected controls. The heatmaps represent the  $\log_2$  fold change of each gene indicated on the right (human ortholog) at the time points below (control group  $n = 5$ , experimental groups  $n = 3$  apart from small intestine 10,000 pfu dose on day eight  $n = 2$ ).

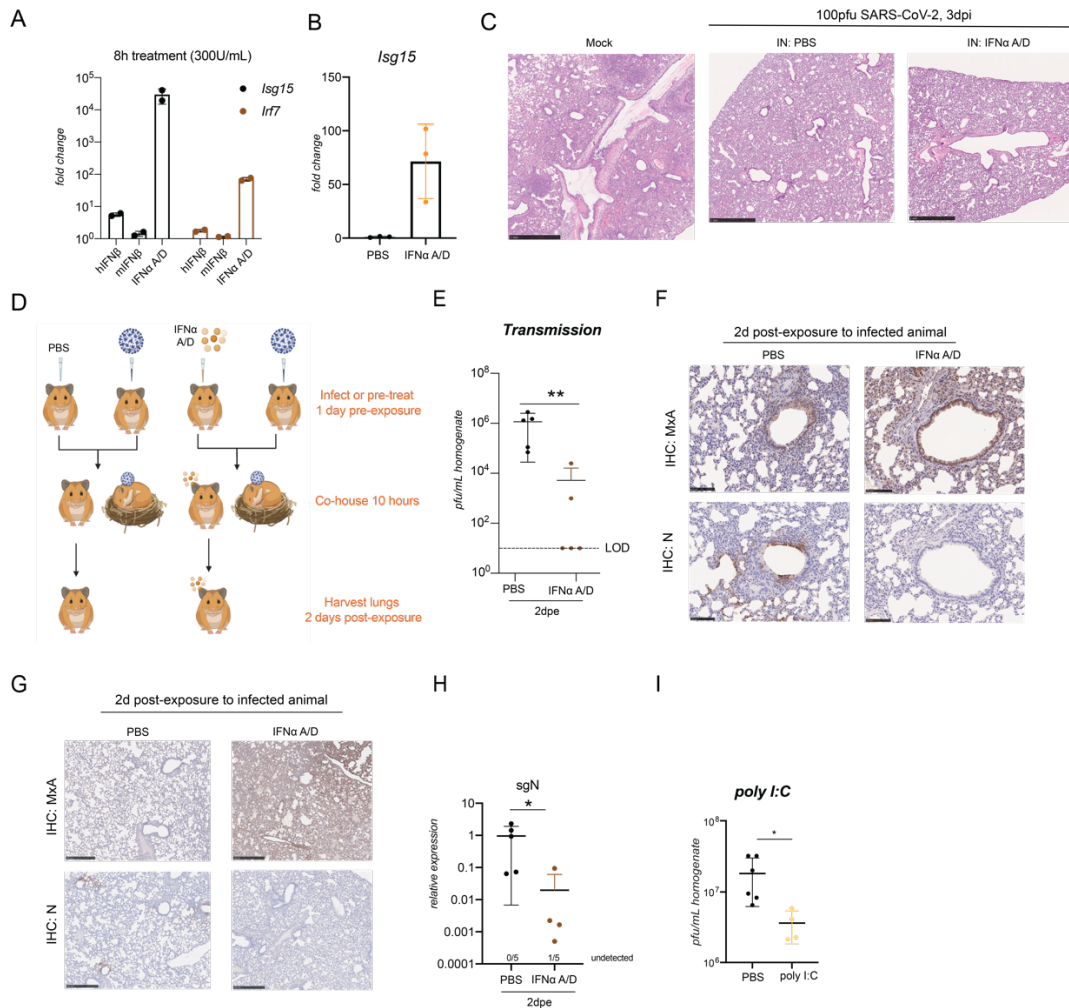

**Figure S7. IFN $\alpha$  A/D induces ISGs in hamster cell lines and reduces viral load after 10pfu SARS-CoV-2 challenge. Related to Figure 7.** (A) qRT-PCR for *Isg15* or *Irf7* after treatment of BHK-21 cells after 8h treatment with 300 U/mL of either hIFN $\beta$ , mIFN $\beta$ , or IFN $\alpha$  A/D displayed as log fold change compared to untreated cells. (B) qRT-PCR of lungs from hamsters treated either with PBS or IFN $\alpha$  A/D for eight hours, ( $n = 3$  per condition). (C) Representative images of hematoxylin and eosin stains from perfused hamster lungs harvested three days after infection with 100 pfu SARS-CoV-2 and daily IN treatment with PBS or 200,000 units of IFN $\alpha$  A/D, scale bar = 1mm. (D) Transmission experimental design from Figure 7F-G. Hamsters were either treated with PBS, IFN $\alpha$  A/D, or infected with 100 pfu SARS-CoV-2. The next day, hamsters treated either with PBS or IFN $\alpha$  A/D were intranasally treated again and cohoused with a SARS-CoV-2-infected hamster for ten hours. They were then removed and caged separately, treated 24 hours later with PBS or IFN $\alpha$  A/D respectively, before lung collection two days after exposure. (E) Plaque assay of lung homogenates from hamsters treated intranasally with PBS or IFN $\alpha$  A/D and exposed to SARS-CoV-2 by transmission (see Figure S7E and Methods), ( $n = 5$ ,  $p = 0.004$ , Mann-Whitney test). (F) sgN levels by qRT-PCR of animals described in (F), ( $n = 5$ ,  $p = 0.0293$ ). (G-H) Representative images from IHC staining for MxA or N protein of perfused lungs from transmission experiment, scale bar = 100  $\mu$ m, and at lower magnification, scale bar = 500  $\mu$ m. (I) Plaque assay of lung homogenate from hamster lungs infected with 100 pfu SARS-CoV-2 harvested two days after infection after daily IN treatment with PBS or 20 $\mu$ g of poly (I:C) starting 24 hours prior to infection, (PBS  $n = 6$ , poly (I:C)  $n = 4$ ,  $p$ -value = 0.007). See Methods for statistical analyses.



**Supplemental Table S5. Related to Key Resources Table.**

**OLIGONUCLEOTIDE SEQUENCES**

| REAGENT or RESOURCE                                                            | SOURCE                       | IDENTIFIER |
|--------------------------------------------------------------------------------|------------------------------|------------|
| Oligonucleotides                                                               |                              |            |
| <i>M. auratus</i> actin forward primer<br>5'-CCAAGGCCAACCGTGAAAAG-3'           | This paper                   | N/A        |
| <i>M. auratus</i> actin reverse primer<br>5'-ATGGCTACGTACATGGCTGG-3'           | This paper                   | N/A        |
| <i>M. auratus</i> Isg15 forward primer<br>5'-TCTATGAGGTCCGGCTGACA-3'           | This paper                   | N/A        |
| <i>M. auratus</i> Isg15 reverse primer<br>5'-GCACTGGGGCTTTAGGTCAT-3'           | This paper                   | N/A        |
| <i>M. auratus</i> Cxcl11 forward primer<br>5'-CCGCCTCATACTGGGAAATGT-3'         | This paper                   | N/A        |
| <i>M. auratus</i> Cxcl11 reverse primer<br>5'-AAGACAGAAGGTTGGGCTCG-3'          | This paper                   | N/A        |
| <i>M. auratus</i> Irf7 forward primer<br>5'-ATTTCCGGTCGCAGGGATCTG-3'           | This paper                   | N/A        |
| <i>M. auratus</i> Irf7 reverse primer<br>5'-TGCAAGATAAAGCGTCCCGT-3'            | This paper                   | N/A        |
| <i>M. auratus</i> Ccl5 forward primer<br>5'-ACTGCCTCGTGTTACATCA-3'             | This paper                   | N/A        |
| <i>M. auratus</i> Ccl5 reverse primer<br>5'-TTCGGGTGACAAAACGACT-3'             | This paper                   | N/A        |
| SARS-CoV-2 Nsp14 (genomic) forward primer<br>5'-TGGGGYTTTACRGGTAACCT-3'        | Chu et al., 2020             | N/A        |
| SARS-CoV-2 Nsp14 (genomic) reverse primer<br>5'-AACRCGCTTAACAAAGCACTC-3'       | Chu et al., 2020             | N/A        |
| SARS-CoV-2 sgRNA (TRS-L) forward primer<br>5'-CTCTTG TAGATCTGTTCTCTAAACGAAC-3' | Yang et al., 2020            | N/A        |
| SARS-CoV-2 N sgRNA reverse primer<br>5'-GGTCCACCAAACGTAATGCG-3'                | Yang et al., 2020            | N/A        |
| SARS-CoV-2 M sgRNA reverse primer<br>5'-TTACTGTACAAGCAAAGCAATATTGTCA-3'        | This paper                   | N/A        |
| <i>M. auratus</i> Il6 forward primer<br>5'-GGTATGCTAAGGCACAGCACACT-3'          | Sanchez-Felipe et al., 2020) | N/A        |
| <i>M. auratus</i> Il6 reverse primer<br>5'- CCTGAAAGCACTTGAAGAATTCC-3'         | Sanchez-Felipe et al., 2020) | N/A        |
| <i>M. auratus</i> Il10 forward primer<br>5'-GAAGGACCAGCTGGACAACA-3'            | This paper                   | N/A        |
| <i>M. auratus</i> Il10 reverse primer<br>5'-TGGCAACCCAAGTAACCCTTA-3'           | This paper                   | N/A        |
